# Supplementary material for: ‘ARVs are a constant reminder of lost freedom, whereas for others, they are liberating’: understanding the treatment narrative among people living with HIV (PLHIV) in Malawi and Zimbabwe–a qualitative study
Source: PubMed Central journal article supplement (PMC10910567; doi:10.1136/bmjopen-2022-063138), 2024-02-28
Supplement: bmjopen-2022-063138supp001.pdf [file bmjopen-2022-063138supp001.pdf]

Supplementary Table 1

| Country      |              | Zimbabwe                               |          |          |          | Malawi   |                                  |       |          | Sub Total |    |           |
|--------------|--------------|----------------------------------------|----------|----------|----------|----------|----------------------------------|-------|----------|-----------|----|-----------|
| Region       |              | Harare                                 | Bulawayo | Midlands | Masvingo | Lilongwe | Blantyre                         | Thylo | Mangochi |           |    |           |
| PLHIV        | Age group    | 18-21                                  | 2        | 1        | 0        | 1        | 1                                | 1     | 0        | 0         | 6  |           |
|              |              | 22-25                                  | 0        | 0        | 1        | 0        | 0                                | 2     | 1        | 0         | 4  |           |
|              |              | 26-30                                  | 0        | 2        | 1        | 1        | 0                                | 0     | 0        | 0         | 4  |           |
|              |              | 31-35                                  | 1        | 0        | 1        | 1        | 2                                | 3     | 1        | 3         | 12 |           |
|              |              | <b>Total</b>                           |          |          |          |          |                                  |       |          |           |    | <b>26</b> |
| HCPS         | Gender       | Female                                 | 2        | 3        | 2        | 1        | 2                                | 2     | 3        | 2         | 17 |           |
|              |              | Male                                   | 1        | 0        | 1        | 2        | 1                                | 3     | 3        | 1         | 12 |           |
|              | Job Title    | Peer Counsellor                        | 1        | 1        | 1        | 1        | Expert Client                    | 2     | 1        | 2         | 1  | 10        |
|              |              | Integrated Care Nurses                 |          | 1        |          |          | Clinical Officer                 | 1     | 2        | 2         | 1  | 8         |
|              |              | ART Nurse                              | 1        | 1        | 1        | 1        | ART Nurse                        | 2     | 0        | 1         | 1  |           |
|              |              | Sexual Reproductive Health(SRH) Nurses | 1        |          |          |          | HIV Testing Services (HTS) Nurse | 0     | 1        | 0         | 0  | 3         |
|              |              |                                        |          |          |          |          | HTS Focus Person                 | 0     | 1        | 0         | 0  | 1         |
| <b>Total</b> |              |                                        |          |          |          |          |                                  |       |          | <b>29</b> |    |           |
| Influencers  | Type of Role | Maternal Figure                        | 1        | 1        | 1        | 1        | Maternal Figure                  | 1     | 1        | 1         | 1  | 8         |
|              |              | WhatsApp Group Leaders                 | 1        | 1        | 1        | 1        | WhatsApp Group Leaders           | 1     | 1        | 1         | 1  | 8         |
|              |              | Workshop Coordinators                  | 1        | 1        | 1        | 1        | Religious Leaders/Pastors        | 1     | 1        | 1         | 1  | 8         |
|              |              | <b>Total</b>                           |          |          |          |          |                                  |       |          |           |    | <b>24</b> |
